# Supplementary material for: Oxides in silver–graphene nanocomposites: electrochemical signatures and electrocatalytic implications
Source: Royal Society of Chemistry journal article supplement (doi:10.1039/c5an00740b), 2015-01-01
Supplement: c5an00740b1.pdf [file c5an00740b1.pdf]

### MAP 1

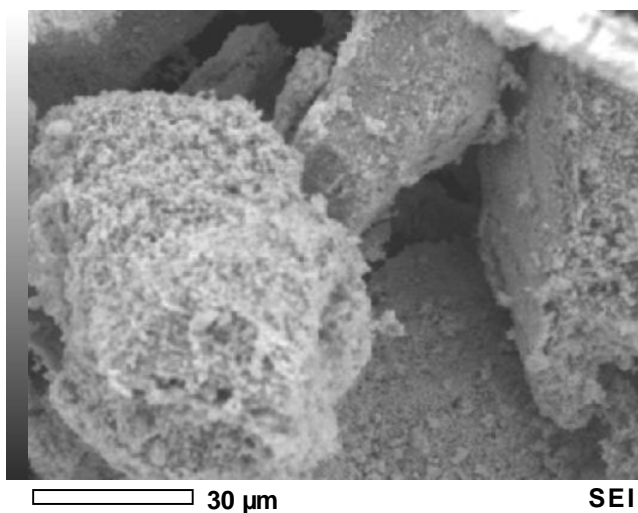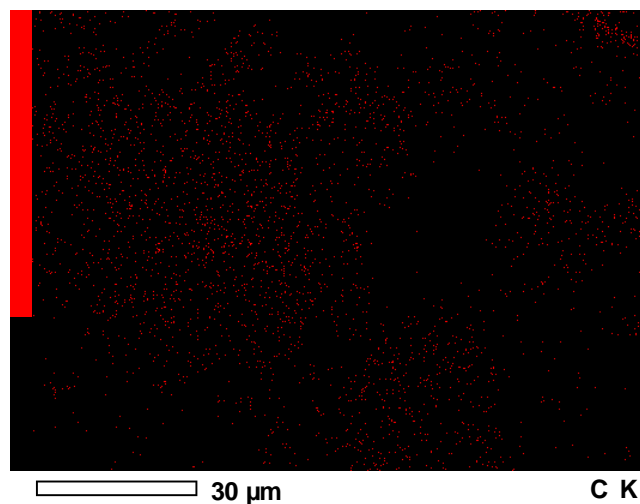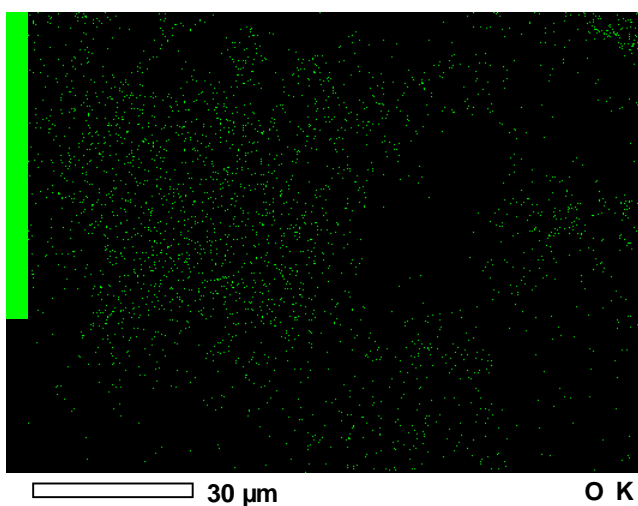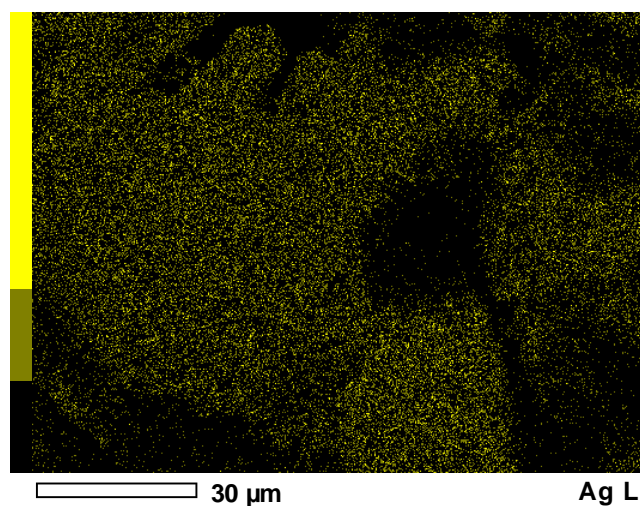

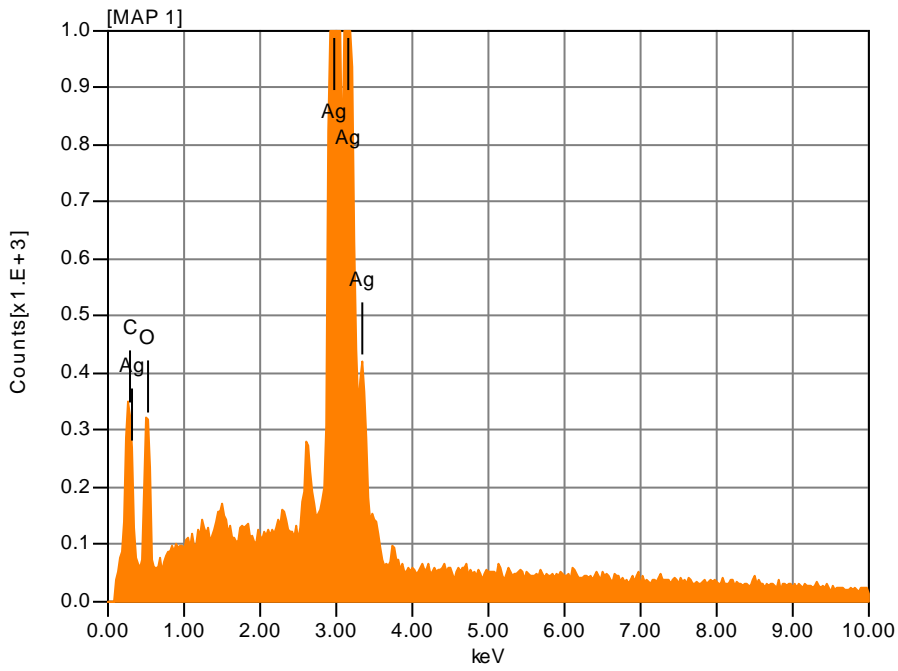

Acquisition Condition

Instrument : 6010LA  
 Volt : 15.00 kV  
 Current : ---  
 Process Time : T2  
 Live time : 98.27 sec.  
 Real Time : 99.07 sec.  
 DeadTime : 1.00 %  
 Count Rate : 955.00 CPS

| Chemical formula | mass%  | Atom%  | Sigma | Net    | K ratio   | Line |
|------------------|--------|--------|-------|--------|-----------|------|
| C                | 3.38   | 16.80  | 0.02  | 5849   | 0.0013090 | K    |
| O                | 9.32   | 34.82  | 0.10  | 7250   | 0.0053180 | K    |
| Ag               | 87.30  | 48.38  | 0.33  | 239771 | 0.2080310 | L    |
| Total            | 100.00 | 100.00 |       |        |           |      |
